# Supplementary material
Source: publisher figshare collection journal article supplement (https://sage.figshare.com/ndownloader/files/20187720)
Supplement: Supplementary file 1 [file 20187720]

**Supplement Table 1**

**Regional Anesthesia Type and Frequency for CPB and No CPB Operations**

| **Regional technique** | **Overall**  (75,409) | | **CPB**  (63,201) | | **No CPB Cardiovascular**  (12,208) | |
| --- | --- | --- | --- | --- | --- | --- |
|  | n | % | n | % | n | % |
| Caudal epidural SS | 2163 | 63.41 | 1711 | 67.23 | 452 | 52.19 |
| Other | 595 | 17.44 | 506 | 19.88 | 89 | 10.28 |
| Caudal epidural Cath | 283 | 8.3 | 219 | 8.61 | 64 | 7.39 |
| Thoracic epidural Cath | 261 | 7.65 | 56 | 2.2 | 205 | 23.67 |
| Lumbar intrathecal SS | 33 | 0.97 | 30 | 1.18 | 3 | 0.35 |
| Paravertebral SS | 29 | 0.85 | 2 | 0.08 | 27 | 3.12 |
| Lumbar epidural SS | 26 | 0.76 | 19 | 0.75 | 7 | 0.81 |
| Lumbar epidural Cath | 17 | 0.5 | 2 | 0.08 | 15 | 1.73 |
| Paravertebral Cath | 4 | 0.12 | 0 | 0 | 4 | 0.46 |
| Missing | 169 | 4.72 | 67 | 2.57 | 102 | 10.54 |

Legend: Percentages represent the proportion amongst all regional techniques in that column. Cath, catheter; SS, single shot
